# Supplementary material
Source: PubMed Central journal article supplement (PMC3401340)
Supplement: NIHMS322747-supplement-1.pdf [file NIHMS322747-supplement-1.pdf]

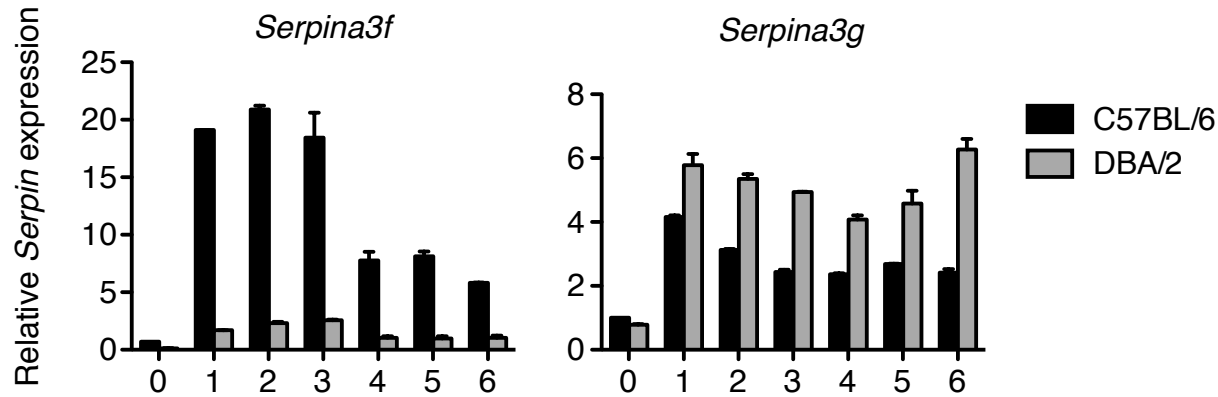

**Supplemental Figure 1. Activated splenocytes upregulate *Serpina3g* and *Serpina3f* expression.**

Splenocytes from C57BL/6 or DBA/2 mice were cultured for the indicated periods in 10  $\mu$ g / ml concanavalin A. Real time PCR using primers specific for *Serpina3g* or *Serpina3f* was performed on cDNA. The serpin expression levels were normalized against  $\beta$ 2microglobulin expression levels. Data show mean  $\pm$  SEM from n = 2 mice.

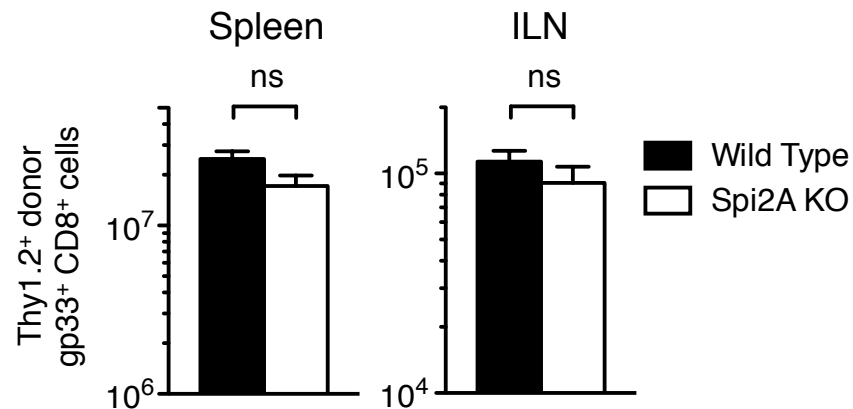

**Supplemental Figure 2. Equivalent expansion of wild type and Spi2A-deficient memory gp33<sup>+</sup> CD8<sup>+</sup> cells**

Gp33 Tetramer<sup>+</sup> CD8<sup>+</sup> splenocytes were isolated from Wild Type and Spi2A KO mice that had been previously infected with LCMV for >90 days and purified by FACS to >98% purity. 5000 memory gp33<sup>+</sup> CD8<sup>+</sup> cells were transferred into naive Thy1.1<sup>+</sup> congenic recipients, which were subsequently infected with LCMV. Eight days post infection, these mice were dissected and analyzed by flow cytometry. The number of Thy1.2<sup>+</sup> donor gp33<sup>+</sup> CD8<sup>+</sup> cells in the spleen and both inguinal lymph nodes (ILN) is shown. No significant difference (ns) was found in the expansion of Wild Type and Spi2A-deficient memory gp33<sup>+</sup> CD8<sup>+</sup> cells. Data show mean ± sem of n = 4 mice.

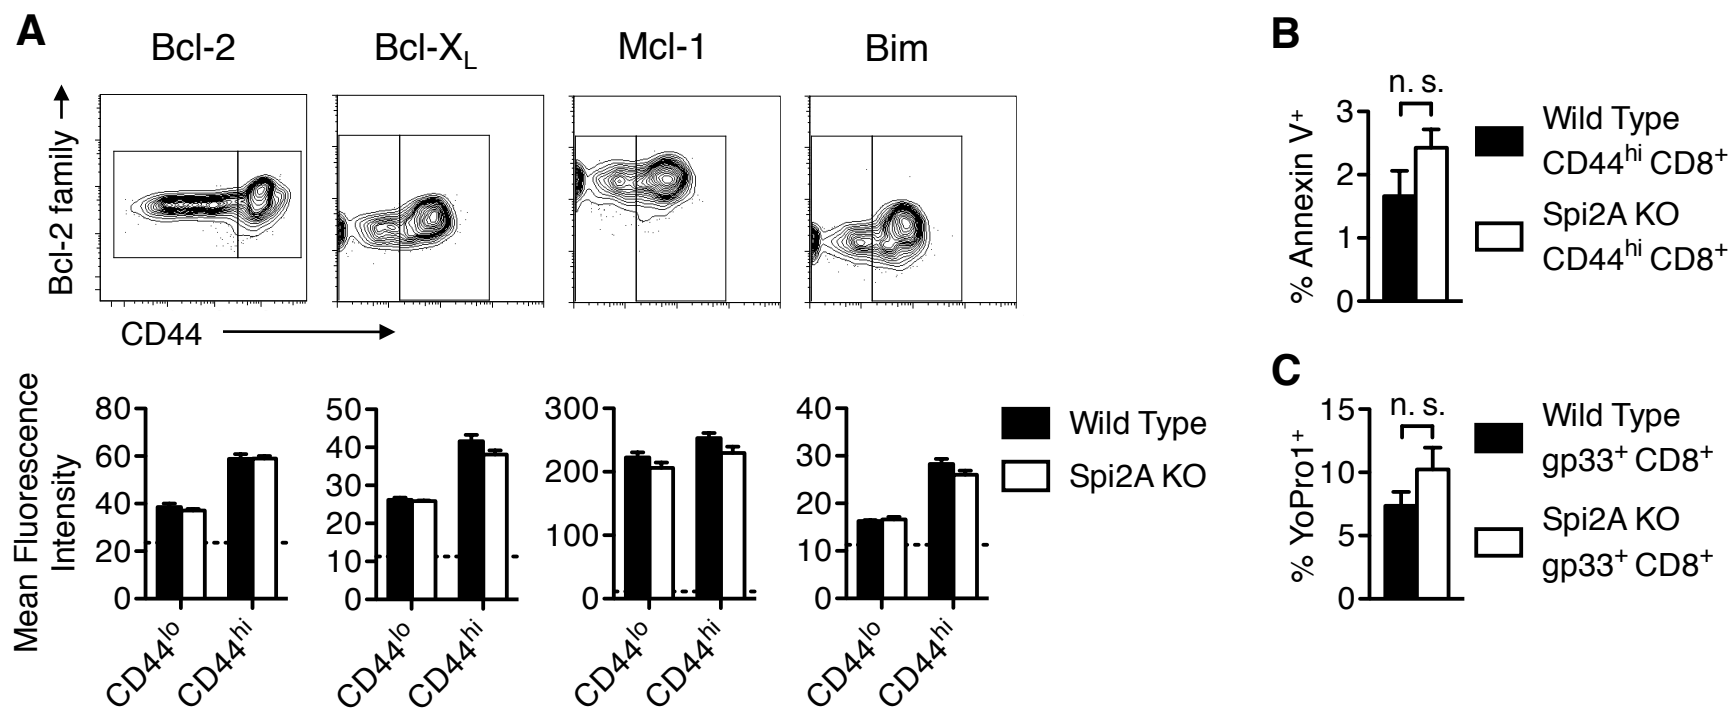

**Supplemental Figure 3. Memory-phenotype CD44<sup>hi</sup> CD8<sup>+</sup> T cells possess similar levels of Bcl-2 family members and both memory-phenotype and LCMV-specific memory CD8<sup>+</sup> cells undergo similar levels of cell death in wild type and Spi2A KO mice.**

(A) Upper row: Representative intracellular flow cytometry staining of indicated Bcl-2 family members gated on wild type CD8<sup>+</sup> bone marrow cells. Lower row: Mean fluorescence intensity of the intracellular Bcl-2 family staining in the CD44<sup>lo</sup> CD8<sup>+</sup> and CD44<sup>hi</sup> CD8<sup>+</sup> populations. Dotted line indicates MFI of isotype control staining. (B) Proportion of Annexin V<sup>+</sup> cells within the bone marrow CD44<sup>hi</sup> CD8<sup>+</sup> T cell population. (C) Wild type and Spi2A KO mice were infected with LCMV Armstrong. After > 130 days, bone marrow leukocytes were stained and analyzed by flow cytometry. The DNA dye YoPro-1 was used to detect apoptosis among CD8<sup>+</sup> gp33 Tetramer<sup>+</sup> cells. Data show mean ± SEM of n = 5 mice. Significance values were calculated by Student's two-tailed t-test (n.s., *P* > 0.05) Results represent two independent experiments.
